# Supplementary material for: Evidence that CA3 is Underling the Comorbidity Between Pain and Depression and the Co-curation by Wu-Tou decoction in Neuropathic Pain
Source: PubMed Central journal article supplement (PMC5607326; doi:10.1038/s41598-017-12184-y), 2017-09-20
Supplement: 41598_2017_12184_MOESM1_ESM.pdf [file 41598_2017_12184_MOESM1_ESM.pdf]

**Title:** Evidence that CA3 is Underling the Comorbidity Between Pain and Depression  
and the Co-curation by Wu-Tou decoction in Neuropathic Pain

**Authors:** Chunyan Zhu<sup>1#</sup>, Qionghong Xu<sup>1</sup>, Chao Wang<sup>1</sup>, Zhiyun Mao<sup>1</sup>, Na Lin<sup>1\*</sup>

**Affiliation:** 1. Institute of Chinese Materia Medica, China Academy of Chinese  
Medical Sciences, Beijing 100700, China;

**# First author:** Chunyan Zhu

**\* Corresponding author:** Prof. Na Lin

**Address correspondence to:** Institute of Chinese Materia Medica, China Academy  
of Chinese Medical Sciences, No. 16, Nanxiaojie, Dongzhimennei, Beijing 100700,  
China.

**E-mail:** linna888@163.com

**Phone:** +861064014411-2869 **Fax:** +861064013996

Supplementary Fig. S1

**A**

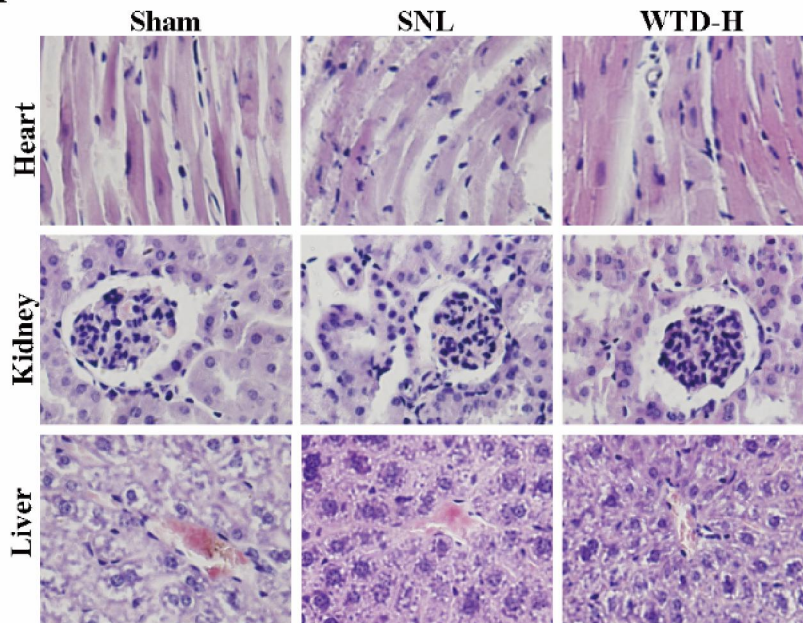

**B**

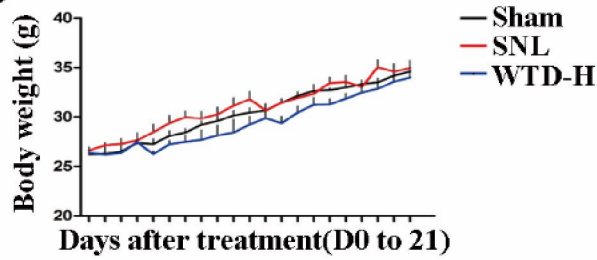

Supplementary Figure 1. The administration of WTD showed no significant injury (A) HE staining on D21 for heart, kidney and liver in Sham, SNL and WTD-H groups. (B) The track record of the body weight from D1 to D21 in Sham, SNL and WTD-H groups.

Supplementary Fig. S2

**A**

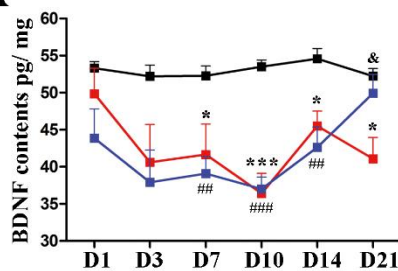

**B**

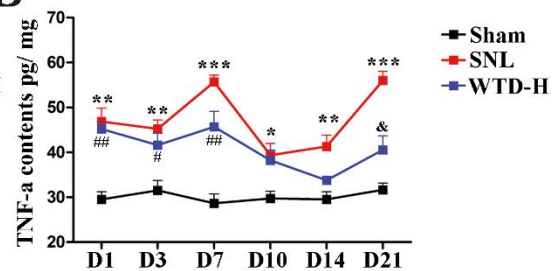

Supplementary Figure 2. The ELISA quantification of BDNF(A) and TNF-a (B) in Sham, SNL and WTD-H groups (Mean  $\pm$  SEM, at least 6 mice were analyzed in each

group), in which \*denotes the significant difference between Sham and SNL (\*P < 0.05, \*\* P < 0.01, \*\*\*P < 0.001), #denotes the significant (#P < 0.05, ##P < 0.01, ###P < 0.001), &denotes the significant(&P < 0.05, &&P < 0.01, &&&P < 0.001)difference between WTD-H and SNL.

### Supplementary Fig. S3

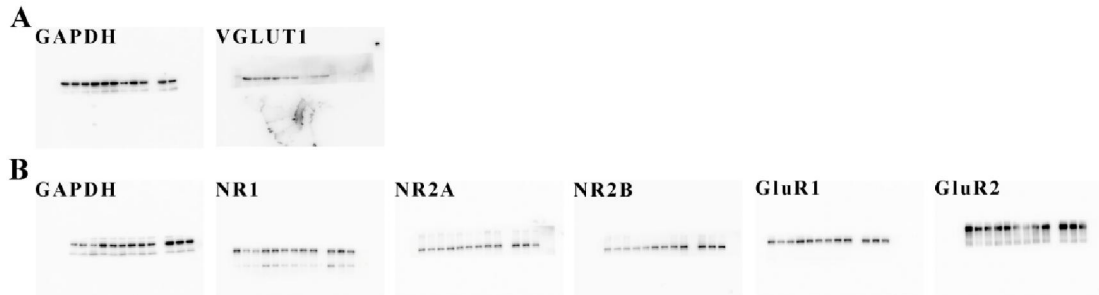

Supplementary Figure 3. The original full-length figures for gels shown in Fig. 4B(A) and 4C(B).

### Supplementary Fig. S4

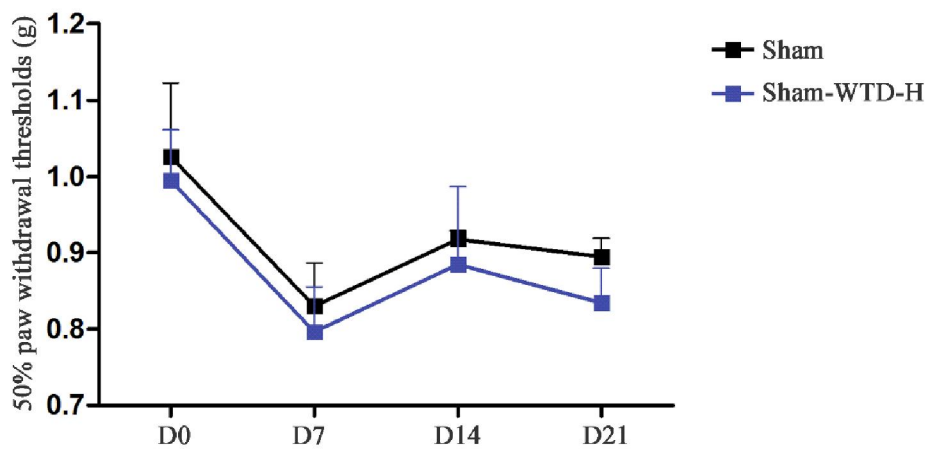

Supplementary Figure 4. The specificity of WTD. Grouped data (Mean  $\pm$  S.E.M, n=8 per group) show no difference in pain thresholds between Sham and Shamed ones administrated with WTD-H for 21days.
